# Supplementary material
Source: MDPI journal article supplement (https://www.mdpi.com/1424-2818/14/2/71)
Supplement: s1 [file s1]

Archive with 10 entries (10 files):
- Figure S1 Parameters in different seasons.pdf
- Figure S2 Regression of number ofspecies and connections.pdf
- Figure S3 Comparision between two types of networks.pdf
- Figure S4 Correlation Matrix of plants.pdf
- Figure S5 Correlation Matrix of birds.pdf
- Fiure S6 Clusteranalysis.pdf
- Fiure S6. Clusteranalysis.pdf
- Table S1 Code of species.xlsx
- TABLES~S1.pdf
- TABLES~S2.pdf
