# Supplementary material
Source: MDPI journal article supplement (https://www.mdpi.com/1424-2818/14/2/71)
Supplement: s1 [file s1 › Table S1 Code of species.xlsx]

## Sheet: Birds
code	Species
B1	Streptopelia orientalis
B2	Streptopelia chinensis
B3	Picus canus
B4	Cyanopica cyanus
B5	Pica pica
B6	Urocissa erythroryncha
B7	Dendrocitta formosae
B8	Pardaliparus venustulus
B9	Parus minor
B10	Spizixos semitorques
B11	Pycnonotus jocosus
B12	Pycnonotus sinensis
B13	Hemixos castanonotus
B14	Phylloscopus fuscatus
B15	Aegithalos caudatus
B16	Aegithalos concinnus
B17	Sinosuthora webbiana
B18	Zosterops japonicus
B19	Garrulax canorus
B20	Garrulax perspicillatus
B21	Garrulax monileger
B22	Garrulax pectoralis
B23	Leiothrix lutea
B24	Acridotheres cristatellus
B25	Spodiopsar sericeus
B26	Spodiopsar cineraceus
B27	Turdus hortulorum
B28	Turdus cardis
B29	Turdus mandarinus
B30	Turdus eunomus
B31	Turdus mupinensis
B32	Tarsiger cyanurus
B33	Copsychus saularis
B34	Phoenicurus auroreus
B35	Passer montanus
B36	Fringilla montifringilla
B37	Eophona migratoria
B38	Chloris sinica
B39	Emberiza elegans

## Sheet: Plants
code	Species
P1	Cornus officinalis
P2	Fatsia japonica
P3	Taxus chinensis
P4	Diospyros glaucifolia
P5	D. Rhombifolia
P6	Cinnamomum camphora
P7	Phoebe chekiangensis
P8	Cayratia japonica
P9	Malus Halliana
P10	Pyracantha fortuneana
P11	Photinia davidsoniae
P12	Cerasus yedoensis
P13	Eriobotrya japonica
P14	Viburnum dilatatum
P15	V. Macrocephalum
P16	Ilex chinensis
P17	I. cornuta
P18	Pistacia chinensis
P19	Choerospondias axillaria
P20	Melia azedarach
P21	Morus alba
