# Supplementary material
Source: MDPI journal article supplement (https://www.mdpi.com/1424-2818/14/2/71)

**Figure S1.** Parameters of networks in different seasons.

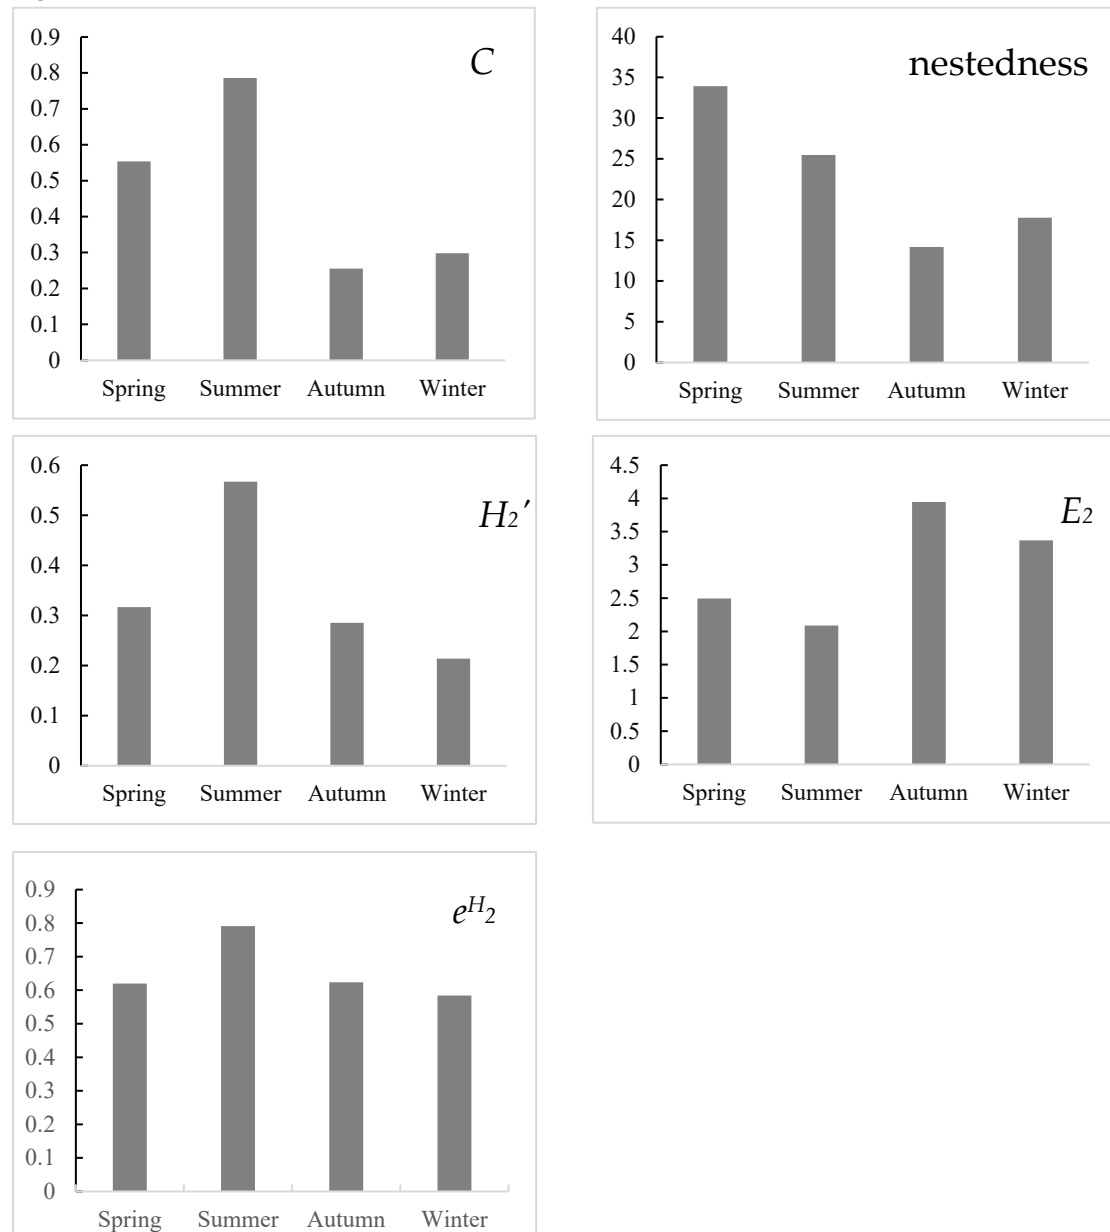

Supplement: s1 [file s1 › Figure S1 Parameters in different seasons.pdf]

**Figure S3. Comparison between observed network and networks generated by null model**

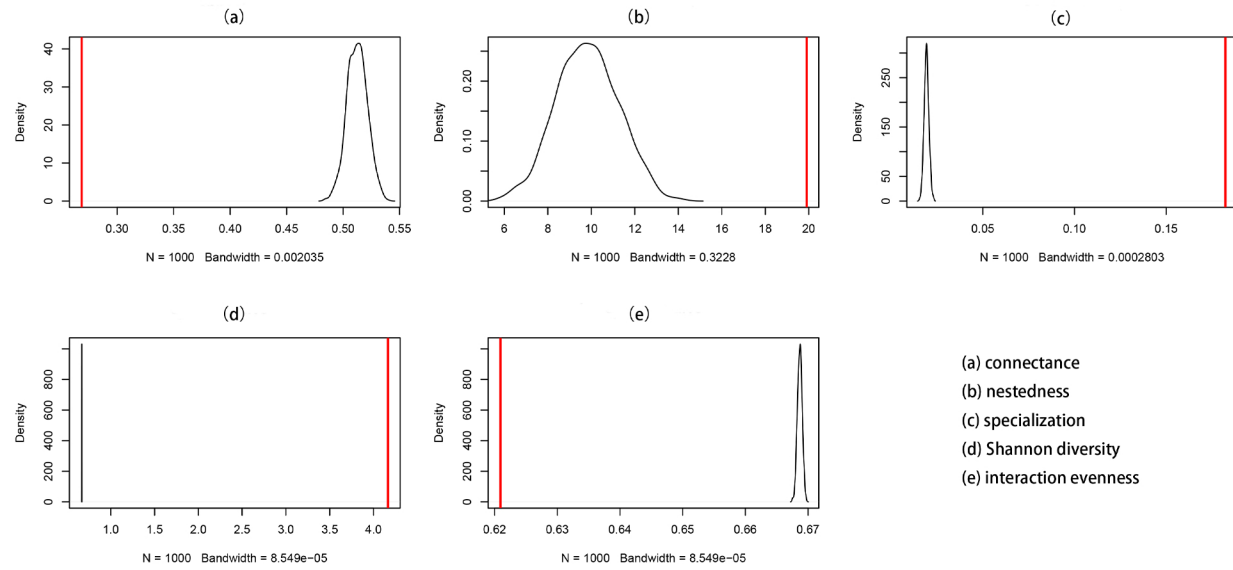

Supplement: s1 [file s1 › Figure S3 Comparision between two types of networks.pdf]

**Figure S5. Correlation Matrix between traits and network roles of birds**

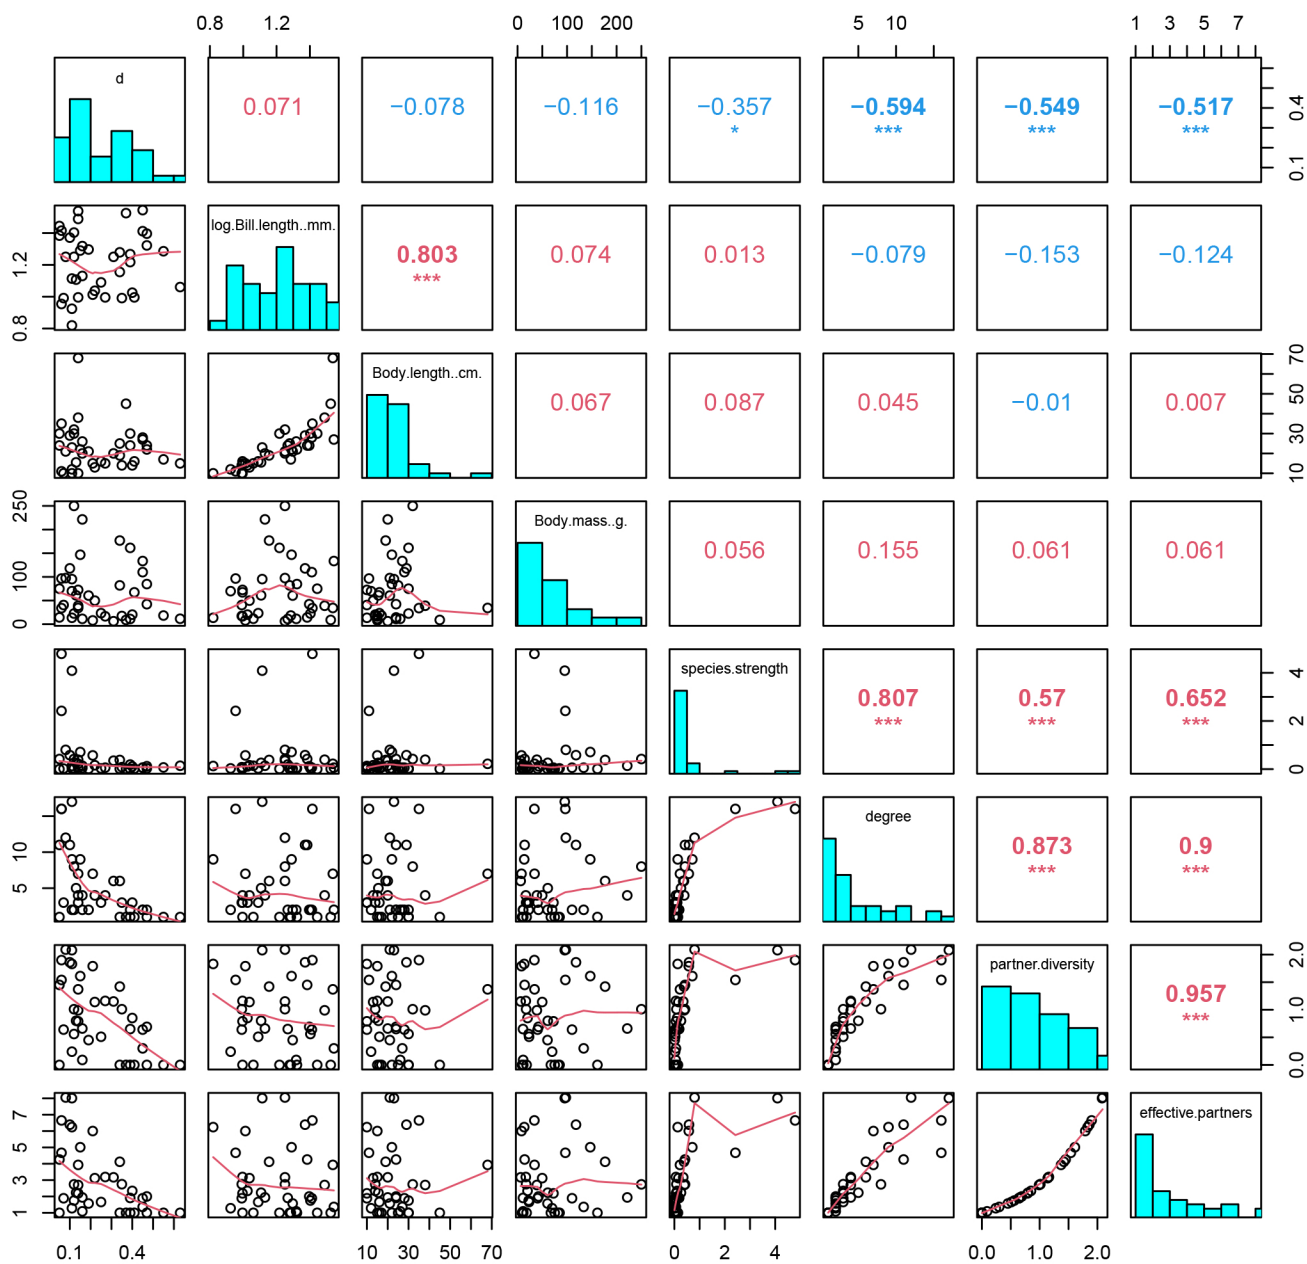

Supplement: s1 [file s1 › Figure S5 Correlation Matrix of birds.pdf]
